# Supplementary material
Source: Royal Society of Chemistry journal article supplement (doi:10.1039/d6ta01364c)
Supplement: d6ta01364c1.pdf [file d6ta01364c1.pdf]

## Supporting Information for

### **Machine learning-assisted screening of copper-cerium bimetallic catalysts for tetracycline degradation**

Qingyu Huang<sup>a,1</sup>, Fei Huang<sup>a,1</sup>, Yang Yu<sup>a\*</sup>, Na Jiang<sup>a</sup>, Chuang Yang<sup>a</sup>, Yuchen Wang<sup>a</sup>,  
and Yongjun Zhang<sup>a\*</sup>

<sup>a</sup> School of Environmental Science and Engineering, Nanjing Tech University, Nanjing  
211816, PR China

<sup>b</sup> School of Pharmaceutical Sciences, Nanjing Tech University, Nanjing 211816, PR  
China

\*Corresponding author.

E-mail address: [yuyang19880421@yeah.net](mailto:yuyang19880421@yeah.net) (Yang Yu)

Postal address: School of Environmental Science and Engineering, Nanjing Tech  
University, Nanjing 211816, PR China.

**Supporting Information** includes the following contents, as cross-referenced throughout the main article:

## Figures

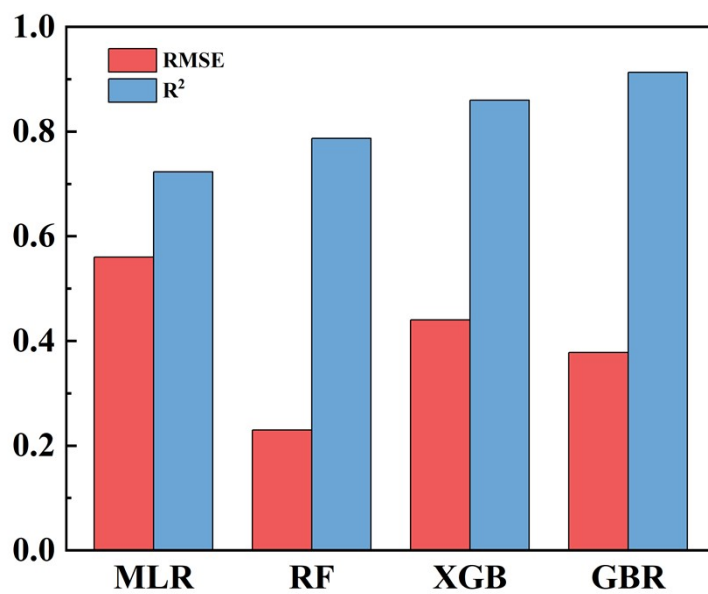

**Figure S1.** The RMSE and R<sup>2</sup> of different algorithmic models.

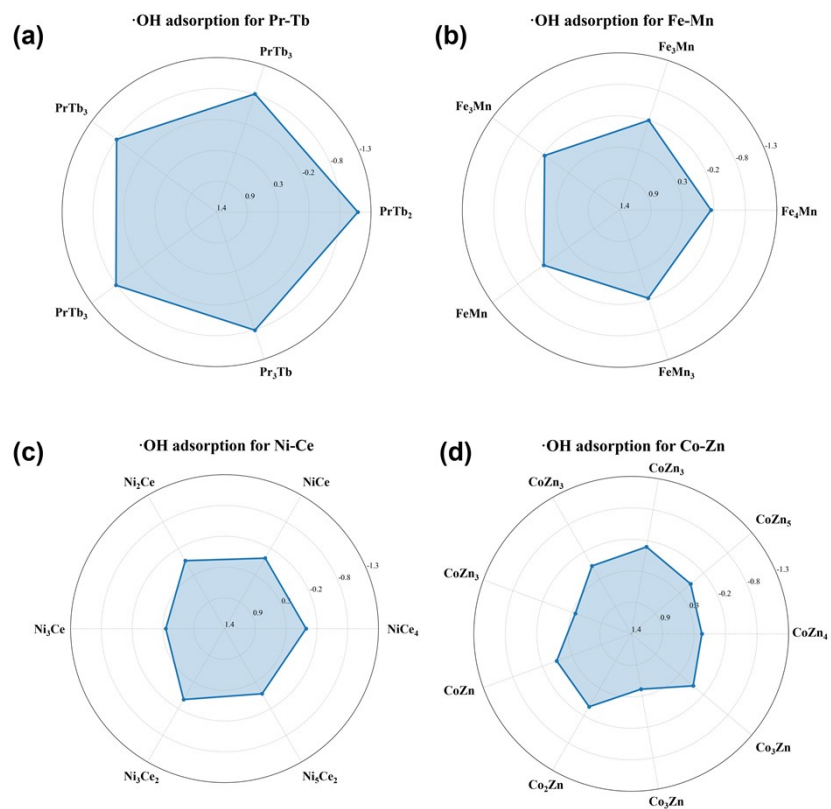

**Figure S2.** Radar chart of the  $\cdot\text{OH}$  adsorption energies predicted by the GBR model for PrTb (a), FeMn (b), NiCe (c), and CoZn (d), respectively.

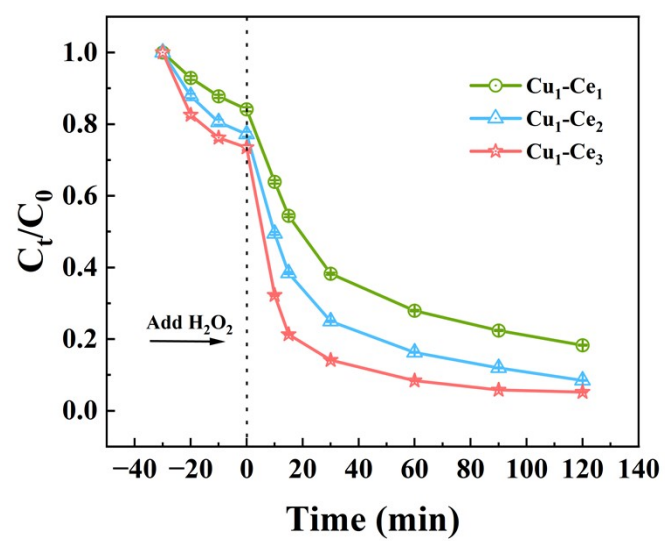

**Figure S3.** The degradation of TC in CuCe bimetallic systems with varying ratios.

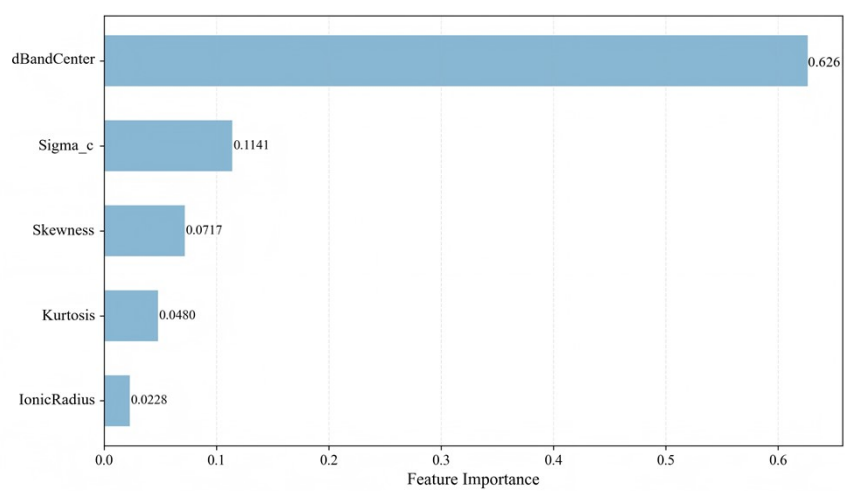

**Figure S4.** The 5 most important features in the GBR model.

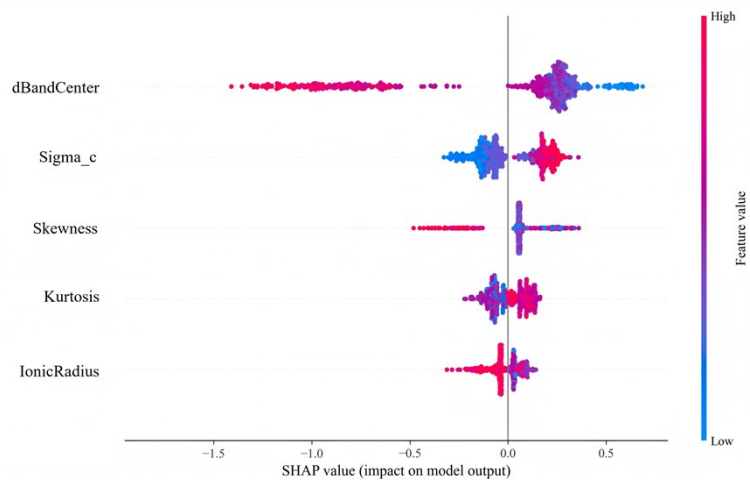

**Figure S5.** SHAP value distributions for each feature and their impact on bimetallic activity model predictions.

**Table S1** Comparative analysis of performance discovery efficiency.

| Metric            | Traditional Experiment       | DFT-only                            | ML-DFT framework                            |
|-------------------|------------------------------|-------------------------------------|---------------------------------------------|
| Search Space      | < 20 candidates              | < 500 candidates                    | 2,200 combinations                          |
| Time Cost         | 2000 days                    | 400 days                            | 8 hours                                     |
| Resources         | Massive chemical reagents    | High-performance computing clusters | Standard workstation and Focused experiment |
| Physical Insight  | Macroscopic observation      | Atomic-level mechanisms             | Mechanism-driven and Data-guided            |
| Research Paradigm | Linear or Random exploration | Computational Screening             | Rapid filtering and Precise validation      |

Traditional methods are typically limited by a narrow search space and extensive experimental cycles, but ML model completed the screening of 2000 bimetallic combinations within 8 hours. The 90% reduction in time cost, combined with high prediction accuracy ( $R^2 = 0.913$ ), underscores the efficiency of using the d-band center as a key descriptor for the rapid discovery of high-performance catalysts, which is consistent with the advanced screening methodologies reported in recent studies.

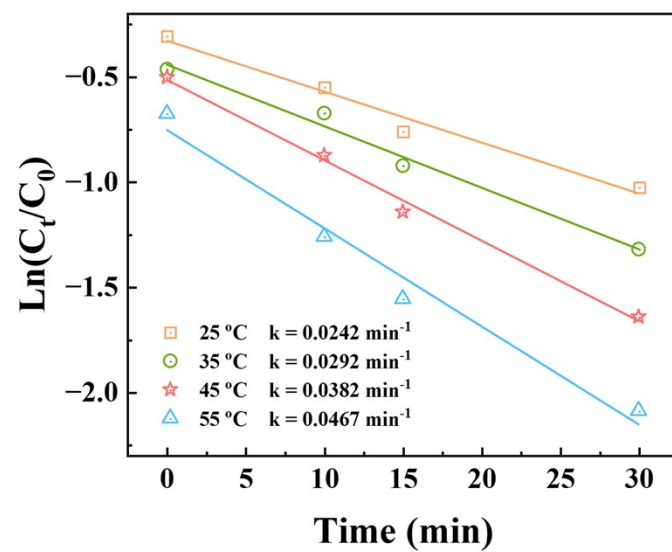

**Figure S6.** Effects of temperature on the pseudo-first-order rate constant ( $k_{\text{obs}}$ ).

$$\ln k = \ln A - \frac{E_a}{R} \times \frac{1}{T} \quad (\text{Eqs. S1})$$

$$\ln \left( \frac{k}{T} \right) = -\frac{\Delta H}{R} \times \frac{1}{T} + \ln \left( \frac{k_B}{h} \right) + \frac{\Delta S}{R} \quad (\text{Eqs. S2})$$

In Eq. S1, where  $E_a$  is the activation energy,  $A$  is the pre-exponential factor, and  $R$  is the universal gas constant.

In Eq. S2, where  $k_B$  is the Boltzmann constant,  $h$  is the Planck constant,  $\Delta H$  is the activation enthalpy, and  $\Delta S$  is the activation entropy.

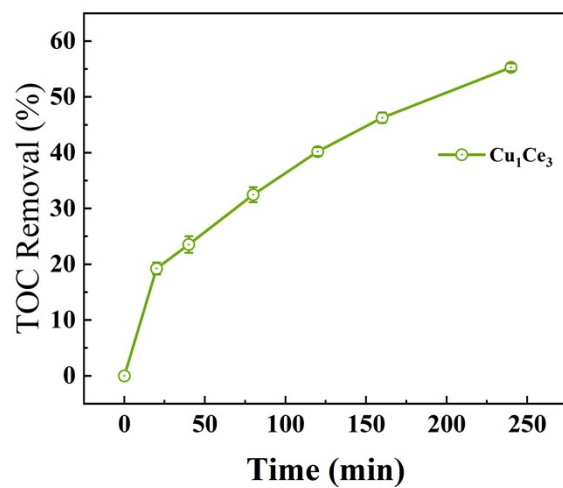

**Fig. S7.** TOC degradation performance of the  $\text{Cu}_1\text{Ce}_3$  bimetallic catalyst.

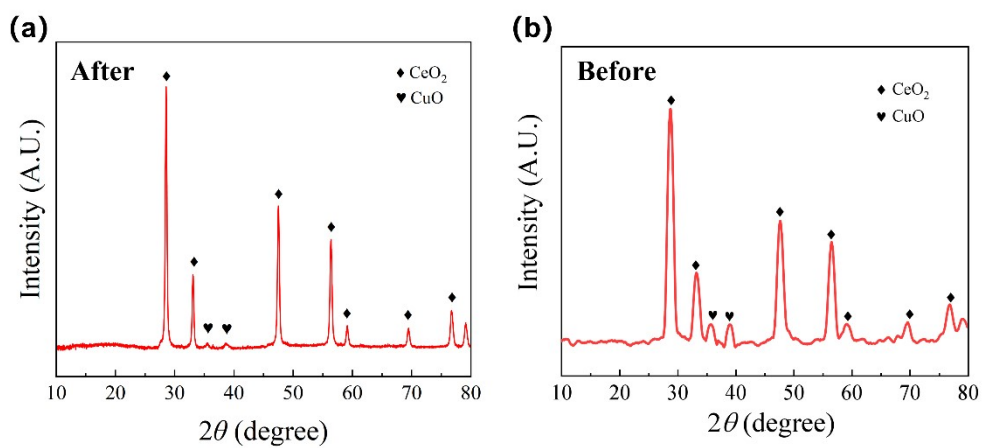

**Fig. S8.** XRD patterns of  $\text{Cu}_1\text{Ce}_3$  bimetallic catalyst before and after reaction.

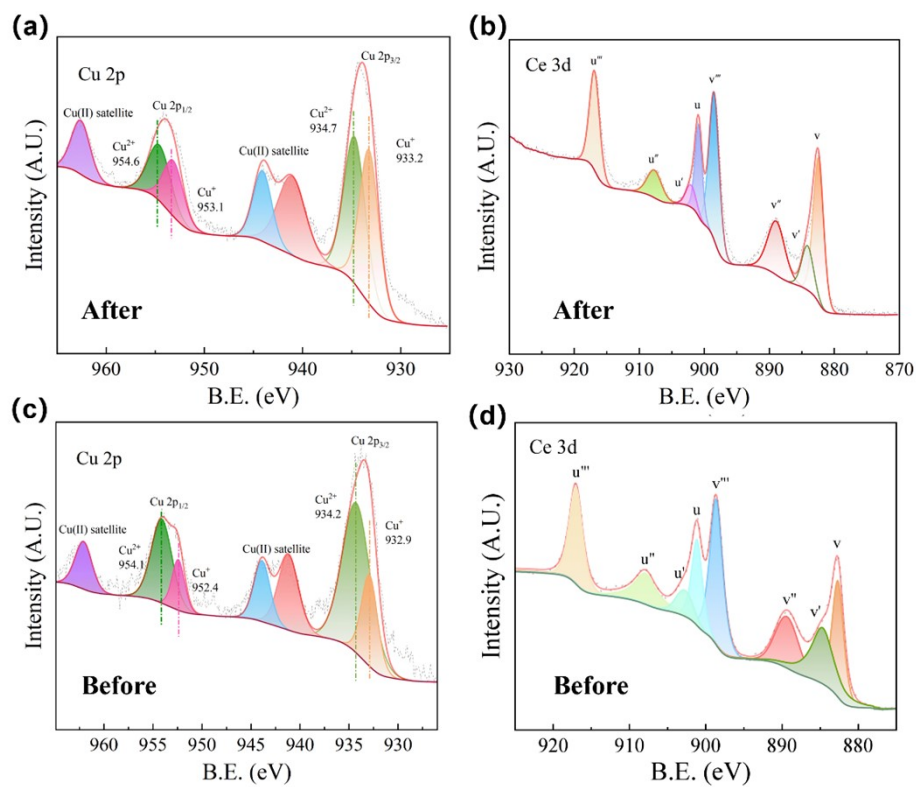

**Fig. S9.** XPS analysis of Cu<sub>1</sub>Ce<sub>3</sub> bimetallic catalyst before and after reaction deconvoluted spectra Cu 2p (a) and Ce 3d (b).

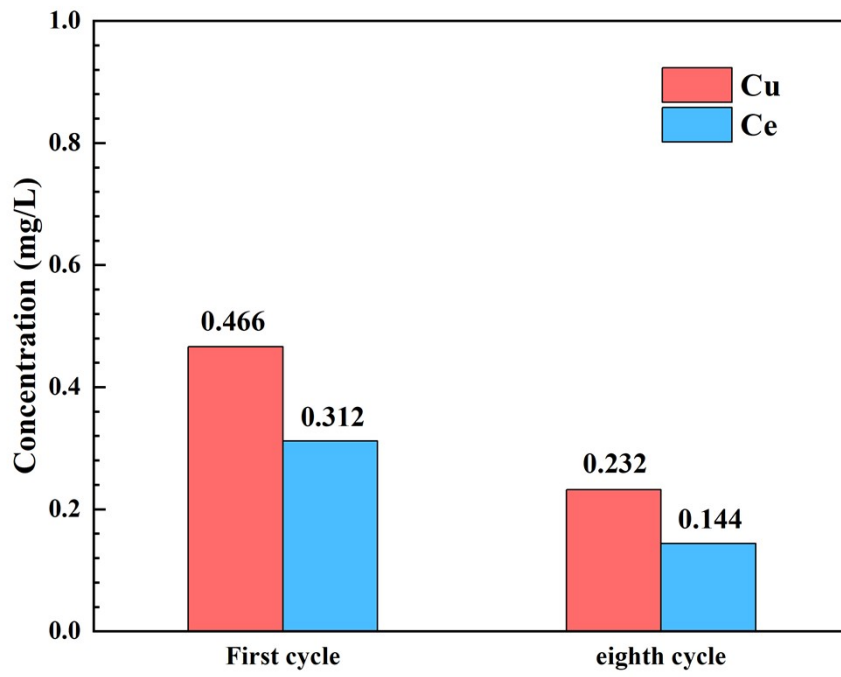

**Fig. S10.** Metal (Cu and Ce) leaching levels in the first and eighth cycles.

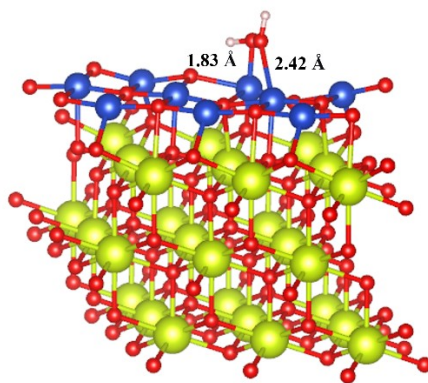

**Fig. S11.** Optimized adsorption configuration of H<sub>2</sub>O<sub>2</sub> on the Cu<sub>1</sub>Ce<sub>3</sub> bimetallic catalyst surface.
